# Supplementary material
Source: publisher figshare collection journal article supplement (https://aacr.figshare.com/articles/dataset/_/23561003)
Supplement: Supplementary file 1 [file 41334809]

**A) Residuals and number of observations**  
(X-squared = 20.4, df = 4, p-value = 0.00042)

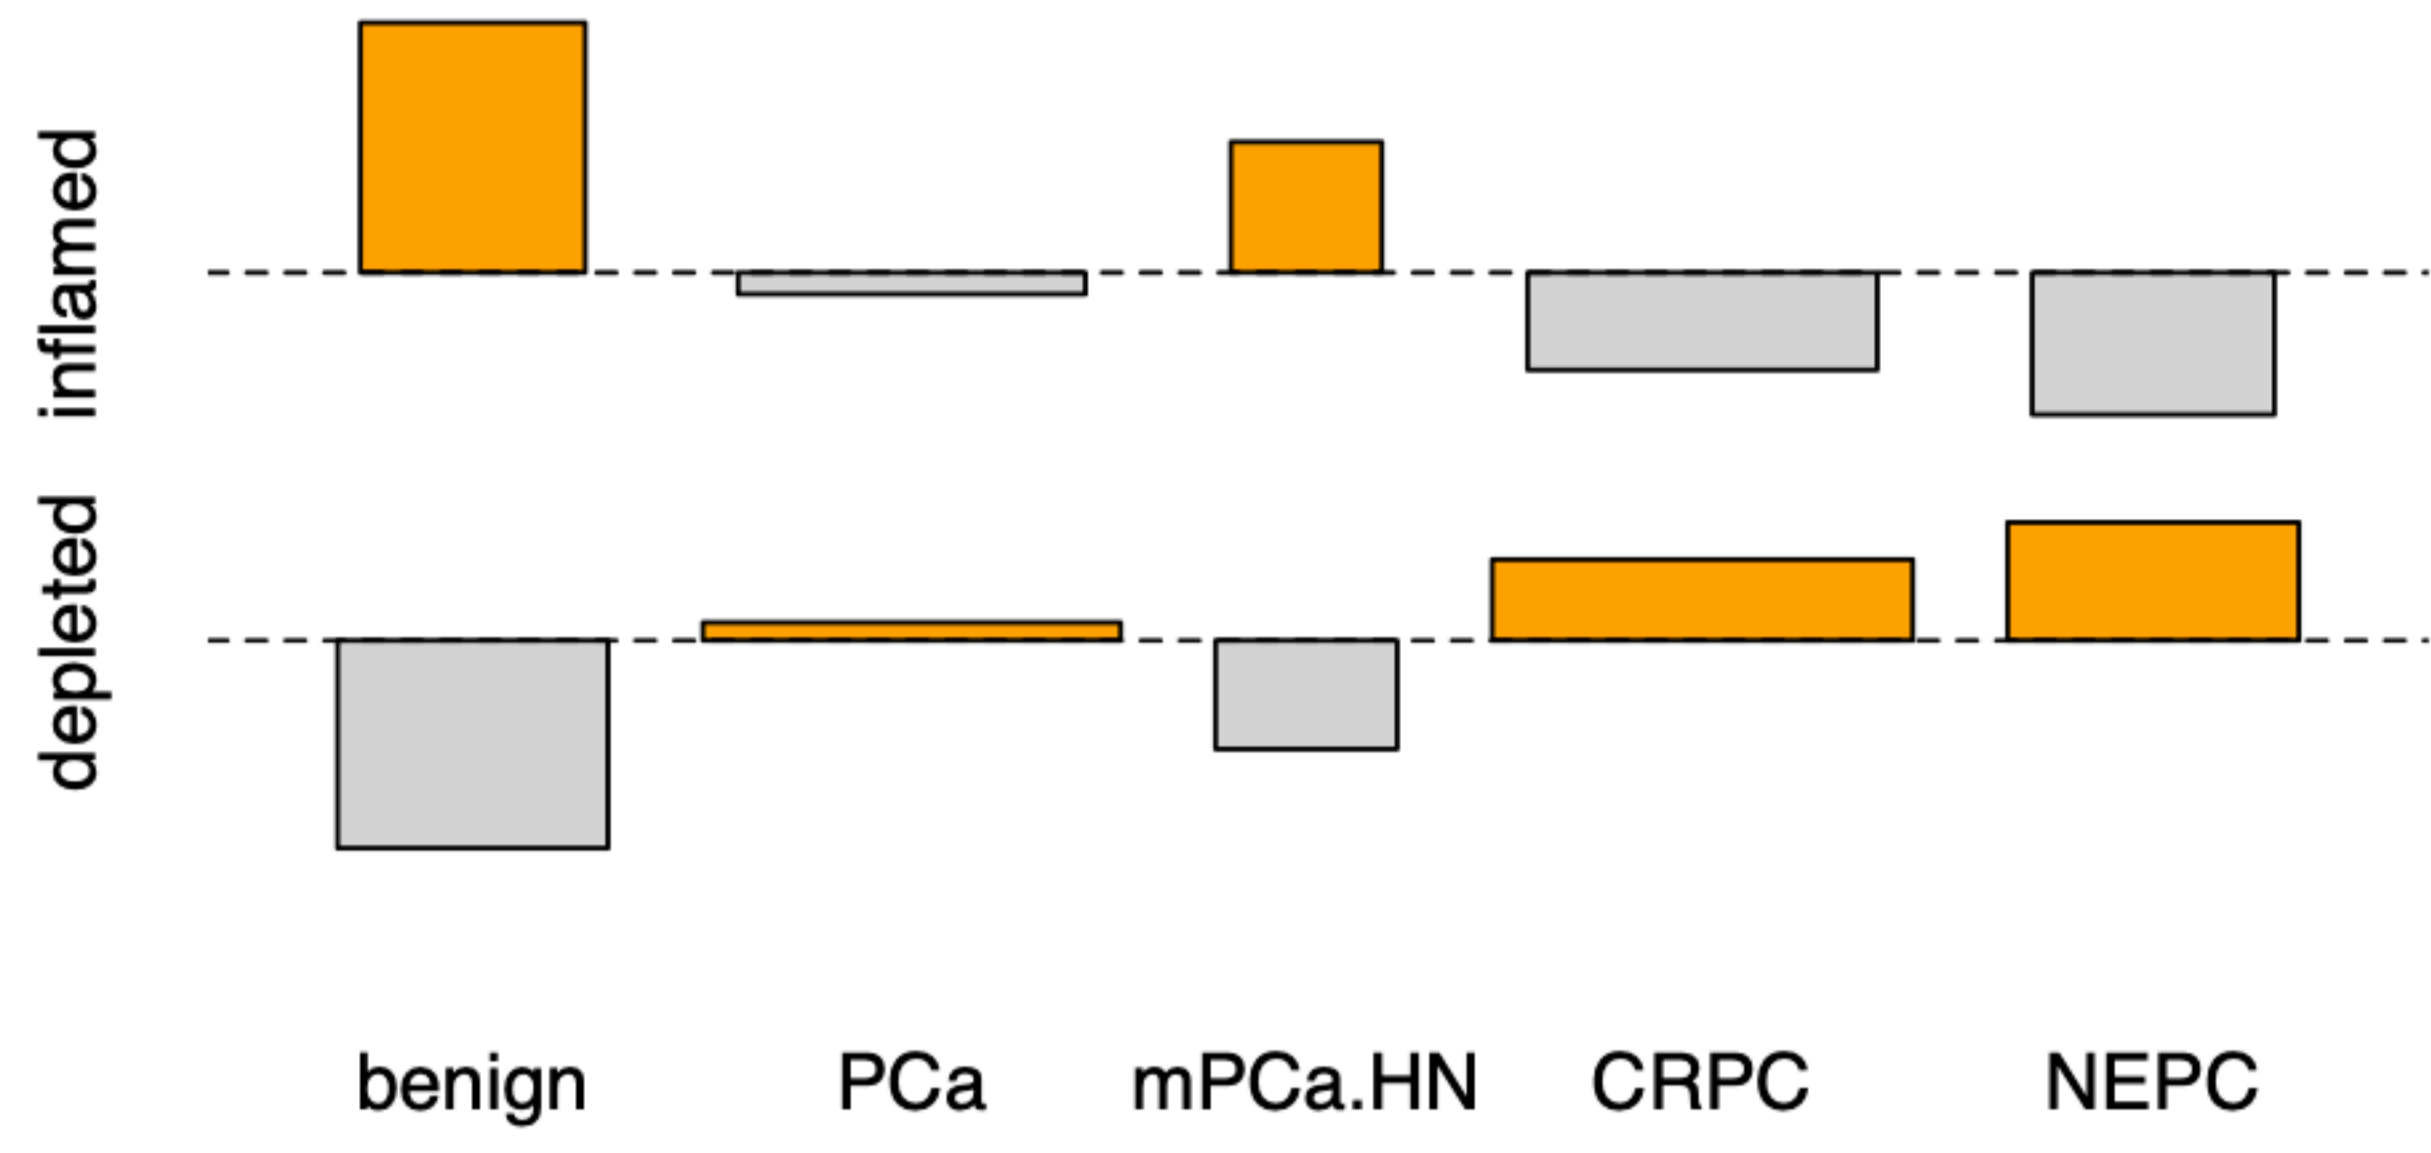

**Pathology Classification**

- Adenocarcinoma
- Adenocarcinoma with NE features
- Inadequate for diagnosis
- Not available
- Small cell

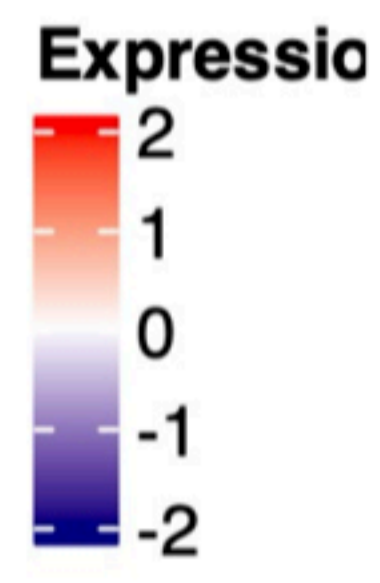

**B)**

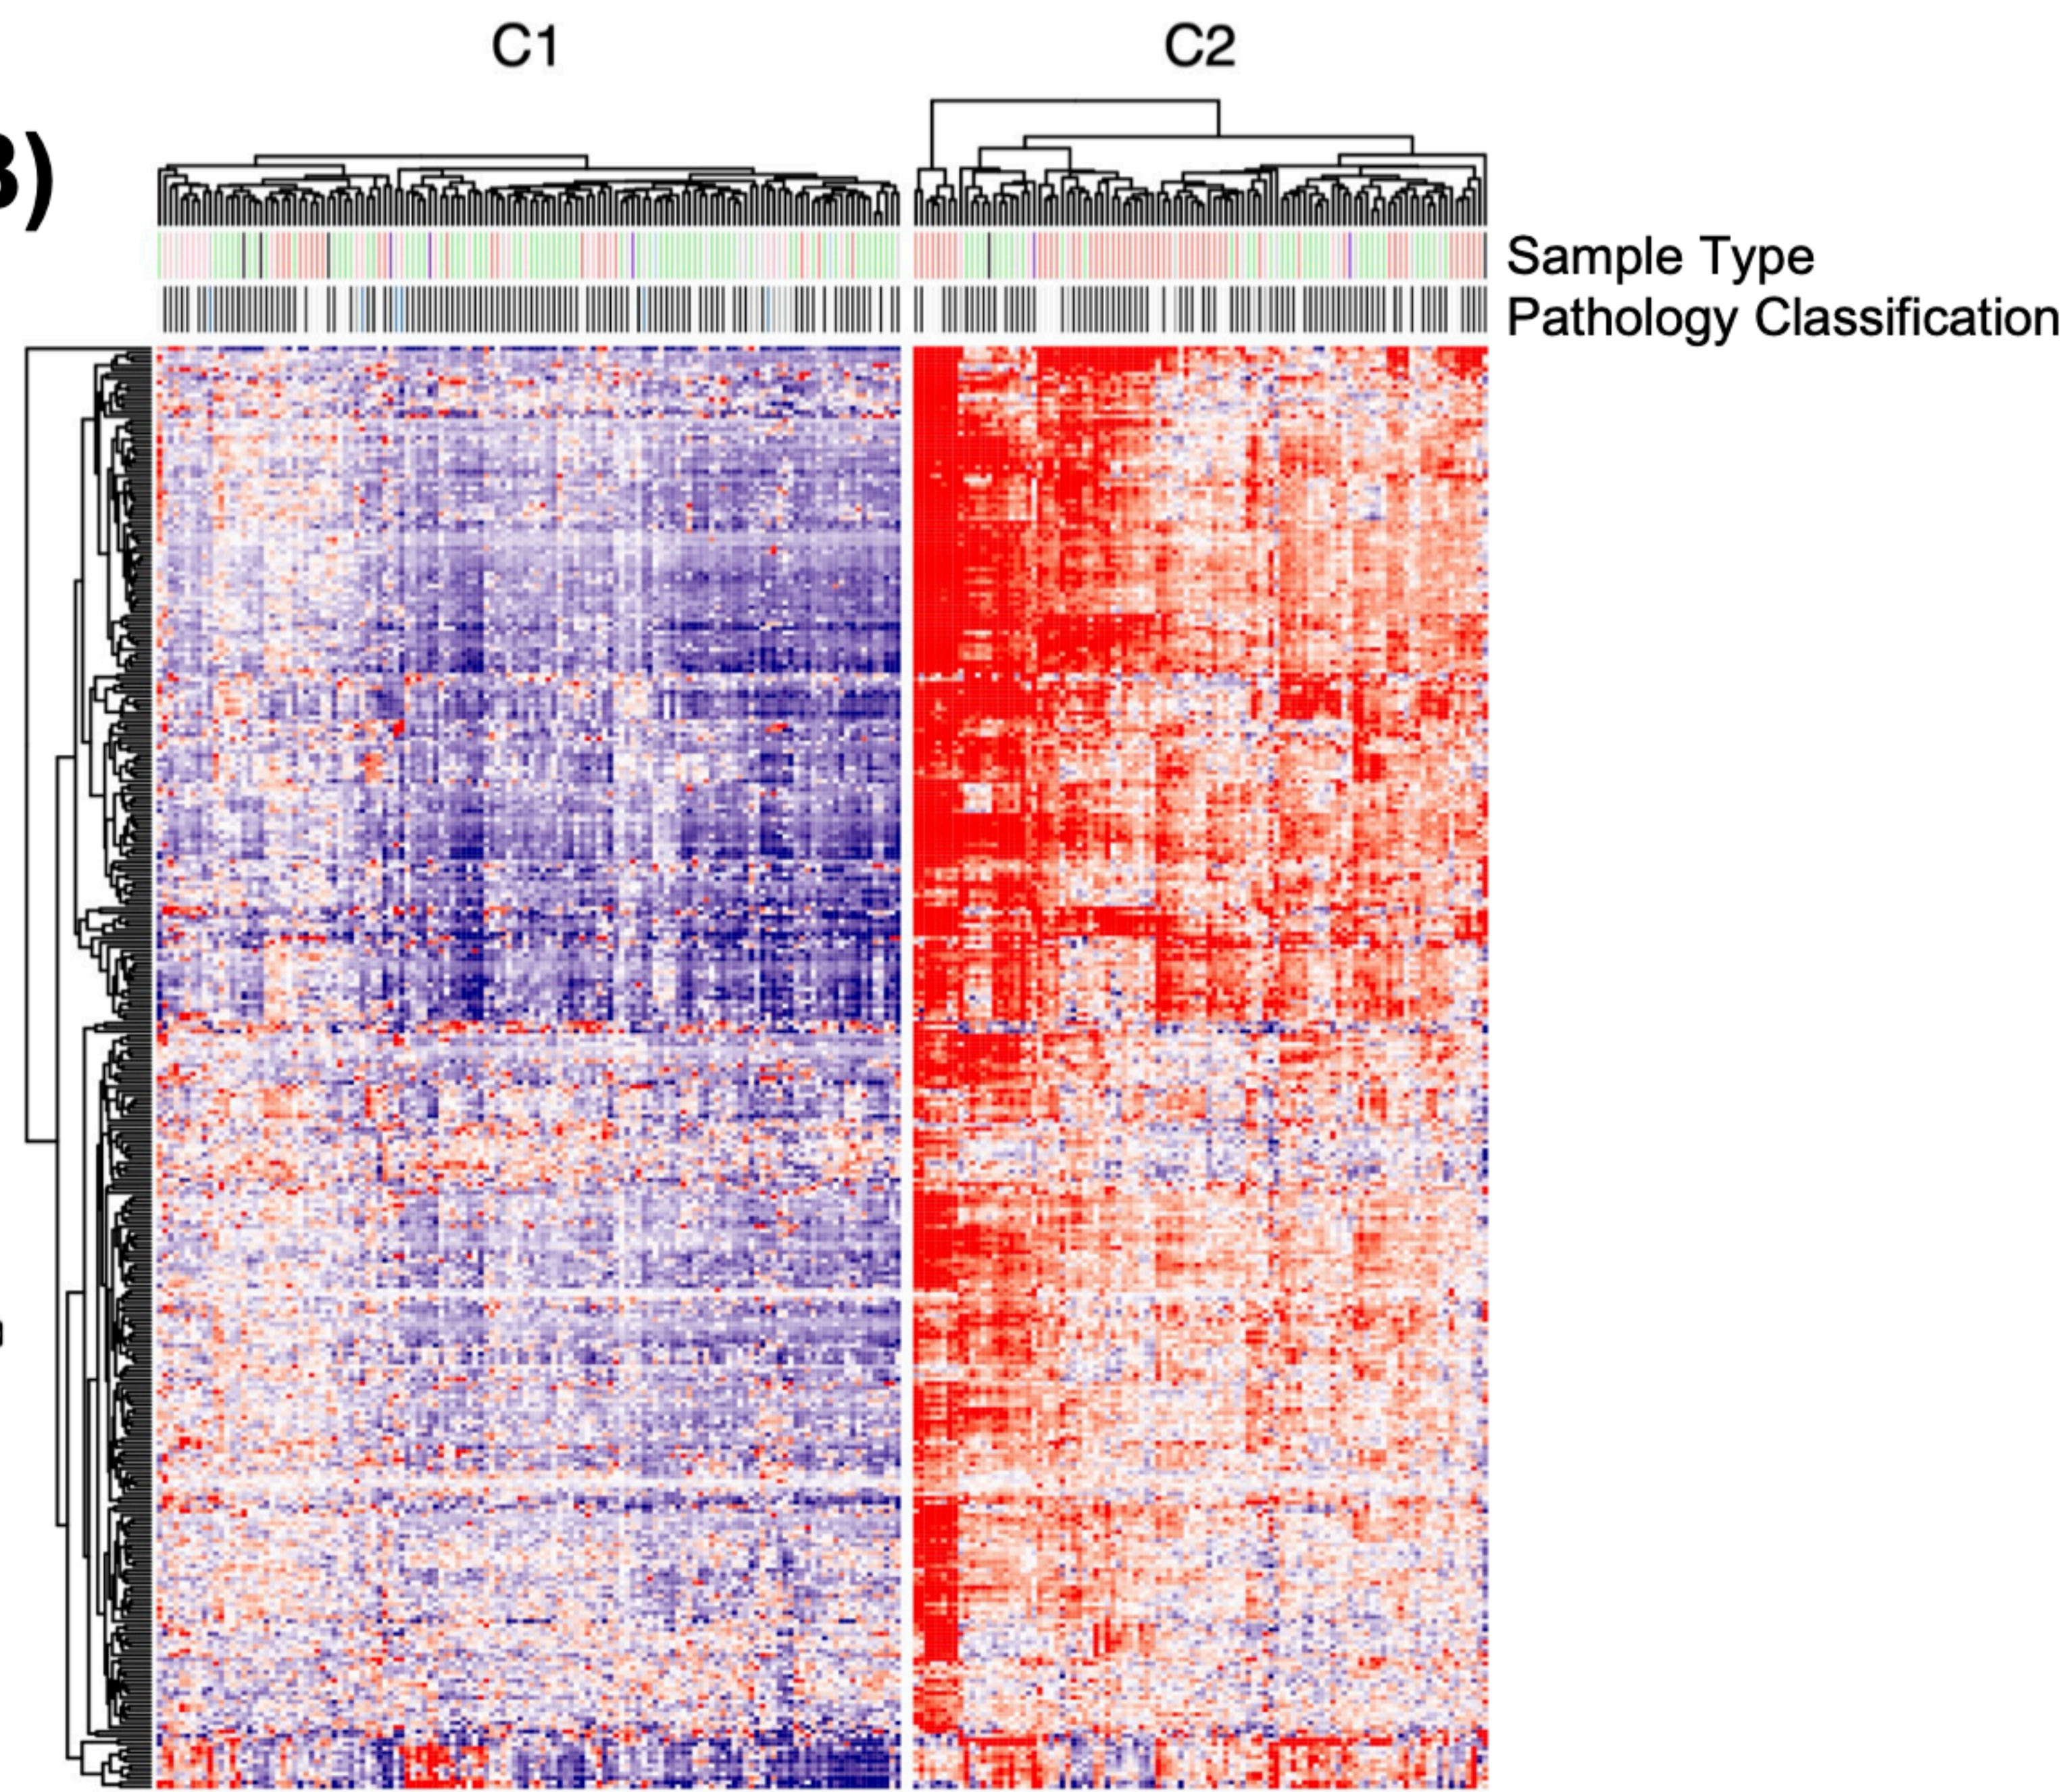

**C)**

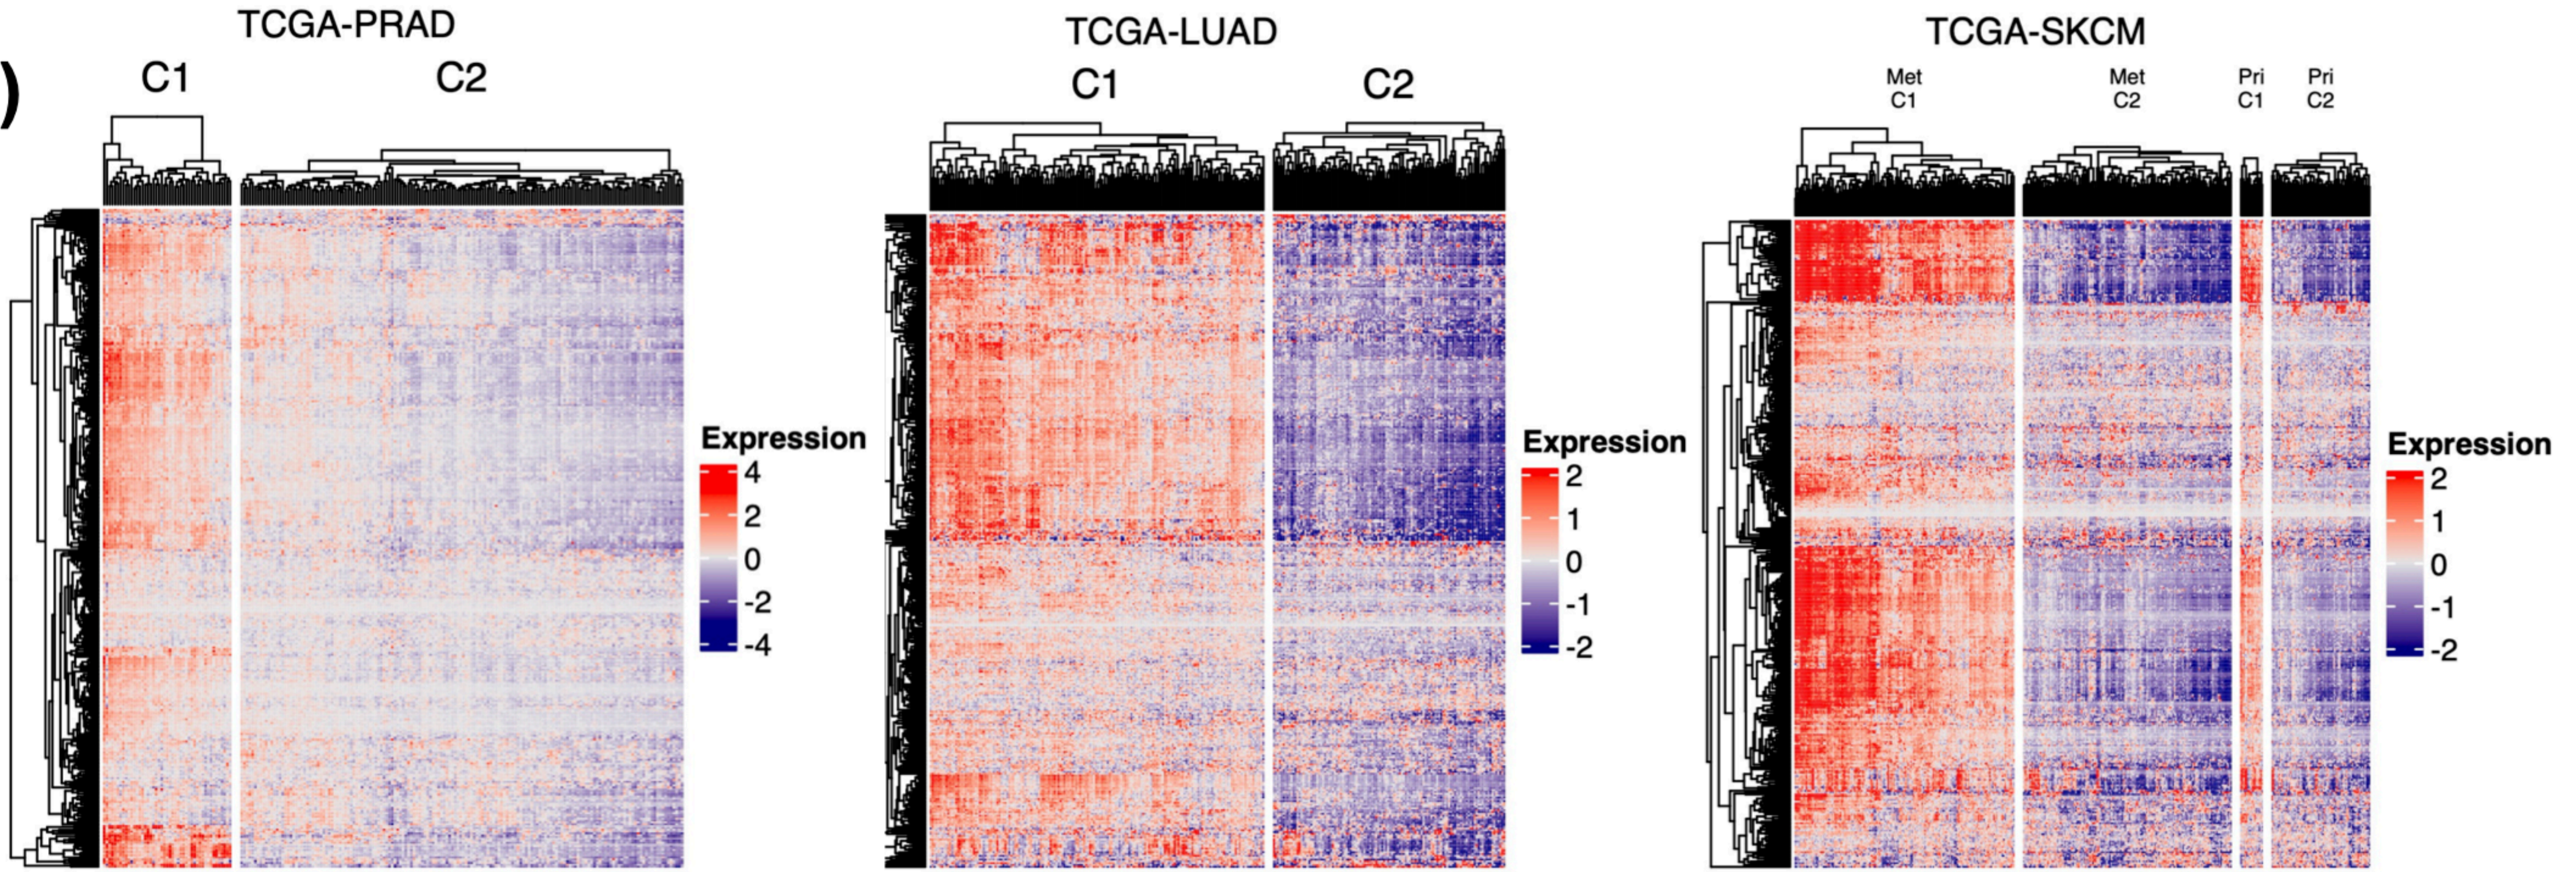

Suppl Figure 2. T-cell signature-based classification of prostate cancer types and other independent cancer cohorts. A) Residuals plot for the Chi-squared test to show participation of prostate cancer diagnosis in T-cell inflamed versus depleted classes. B) Heatmap showing T-cell inflamed and depleted clusters identified by our signature in the SU2C prostate cancer cohort. C) Heatmap showing T-cell inflamed and depleted clusters identified by our signature in the TCGA cohorts for Prostate Adenocarcinoma (PRAD), Lung Adenocarcinoma (LUAD) and Melanoma (SKCM) cancers. Met is metastatic and pri is primary tumors.
